# Supplementary material for: High-Amylose Maize, Potato, and Butyrylated Starch Modulate Large Intestinal Fermentation, Microbial Composition, and Oncogenic miRNA Expression in Rats Fed A High-Protein Meat Diet
Source: MDPI journal article supplement (doi:10.3390/ijms20092137), 2019-04-30
Supplement: s1 [file s1]

## Supplemental Figure

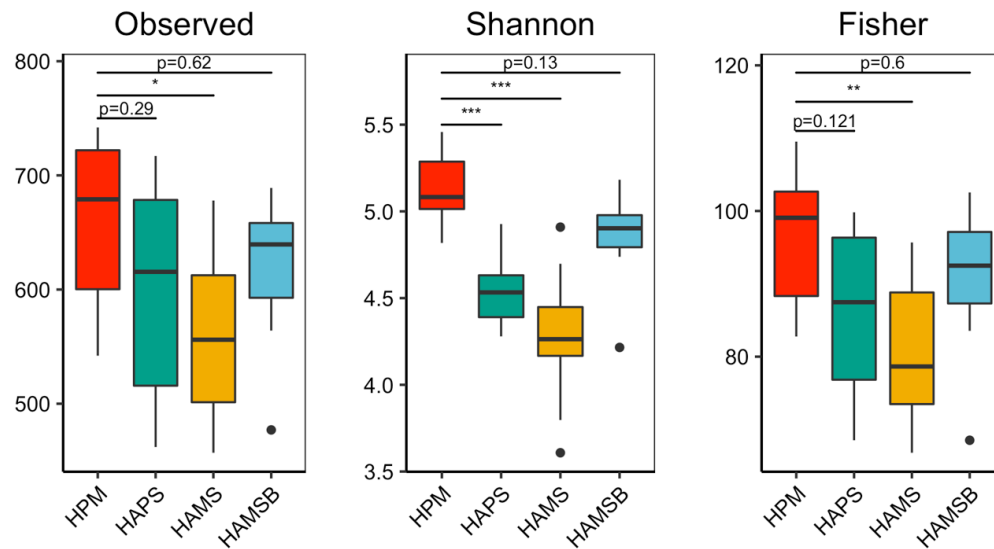

**Suppl. Figure S1.** Alpha diversity metrics of the rat caecal microbiota. (A) Observed OTU's ( $p=0.0439$ ), (B) Shannon index ( $p=2.33e-07$ ), and (C) Fisher's alpha test are shown ( $p=0.00965$ ). ANOVA followed by Tukeys HSD was used to determine statistical significance (\*  $p < 0.05$ , \*\*  $p < 0.01$ , \*\*\*  $p < 0.001$ ). HPM: high protein meat, HAPS: HPM + high-amylose potato starch, HAMS: HPM + high amylose maize starch, HAMSB: HPM + butyrylated high-amylose maize starch.
